# Supplementary material
Source: Springer Nature journal article supplement (https://publikationen.ub.uni-frankfurt.de/files/7207/12943_2009_465_MOESM5_ESM.PDF)
Supplement: MOESM5 [file 12943_2009_465_MOESM5_ESM.PDF]

Additional file 5

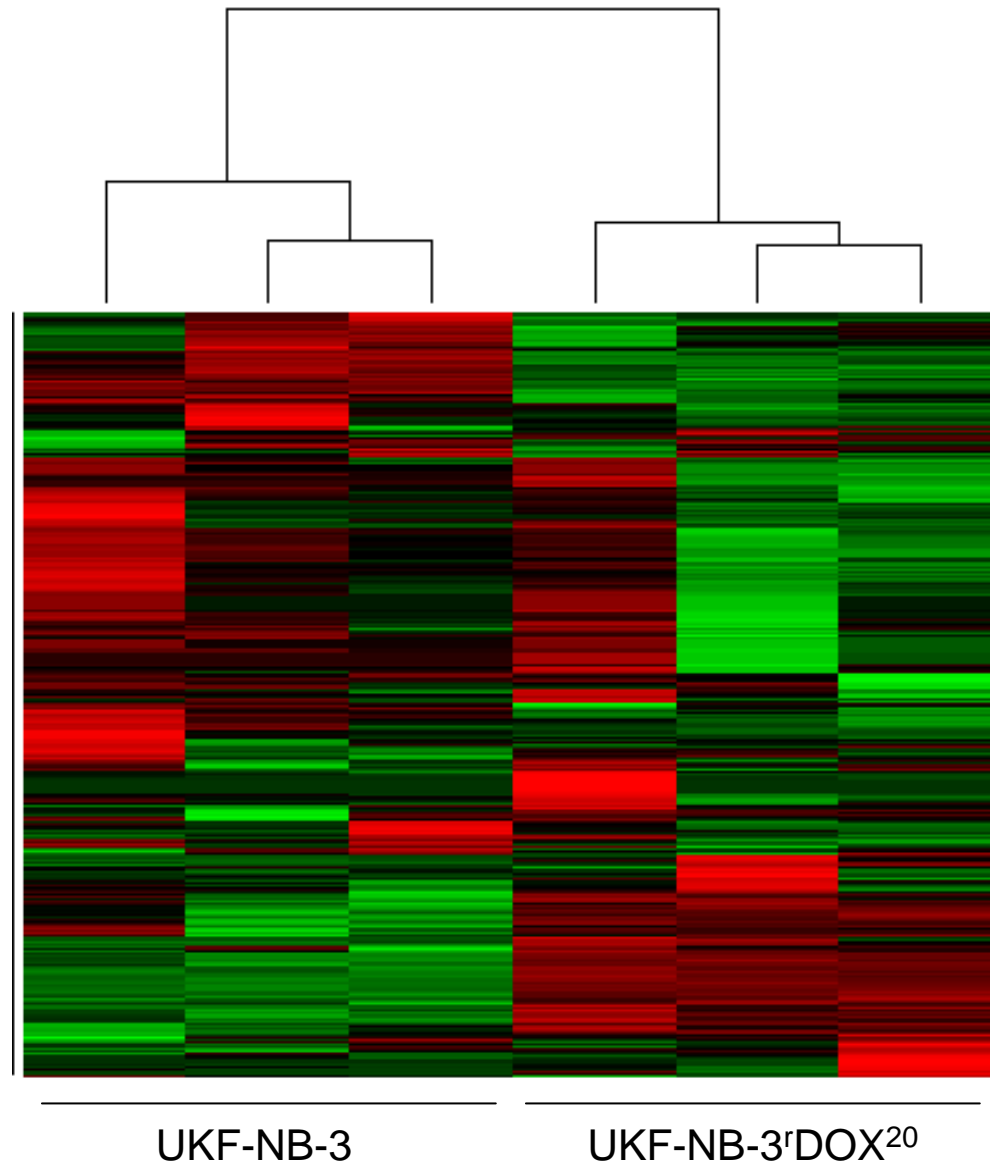

**Additional file 5.** Hierarchical cluster analysis and heatmap showing expression of angiogenesis-associated genes (taken from PANTHER pathway) in UKF-NB-3 or UKF-NB-3rDOX<sup>20</sup> cells.
